# Supplementary material
Source: publisher figshare collection journal article supplement (https://tandf.figshare.com/ndownloader/files/39654630)
Supplement: Supplementary file 1 [file 39654630]

**Appendix:**

**Appendix (A)**

**Sheet for history of mobile phone use in Arabic language**

1-هل يلعب ابنك أو بنتك ألعاب الفيديو عن طريق؟

أ-التليفون المحمول ( )

ب-البلاى ستيشن ( )

ج-الاكس بوكس ( )

د-الكمبيوتر أو اللاب توب ( )

ه-أجهزة أخرى ( )

2-ما هى الألعاب المفضلة لديه ؟

أ-الألعاب العنيفة (قتال،حروب....) ( )

ب-ألعاب سباق ( )

ج-ألعاب تعليمية ( )

د-العاب البناء والتركيب ( )

ه-أخرى ( )

3-كم مدة استخدامه لهذه الألعاب يوميا؟ ................................................

4-كم كان عمر طفلك عندما باستخدام الألعاب؟........................................

5-كم عدد سنوات استخدام طفلك للهاتف المحمول؟....................................

6-هل يمتلك طفلك هاتف محمول؟

أ-نعم ( )

ب-لا ( )

7-ما نوع الهاتف المحمول ؟ ..................................................

8-هل يجرى طفلك مكالمات تليفونية؟

أ-نعم ( )

ب-لا ( )

9-ماذا عن مستوى طفلك التعليمى؟

أ-ممتاز ( )

ب-جيد ( )

ج-متوسط ( )

د-ضعيف ( )

10-هل لاحظت ضعف فى

أ-الذاكرة ( )

ب-التركيز ( )

ج-الانتباه ( )

د-التحصيل الدراسى بشكل عام ( )

ه-لا يوجد ( )

11-هل يعانى طفلك من أى مشاكل مرضية؟ وما هى ان وجد؟

............................................................................................................................................................................................................................................

**Appendix (B)**

**Auditory Vigilance Test in Arabic language**

Stage I:

1**-تكرار كلمة بطة:**

البطة السوداء كانت وحيدة بين أخواتها وفى أحد الأيام سقطت بطة فى حفرة فمدت البطة السوداء عصا صغيرة لأختها حتى استطاعت البطة الخروج ومن يومها وأصبحت البطة السوداء محبوبة بين أخواتها.

**2-تكرار كلمة كرة:**

كل الأطفال يحبون اللعب بالكرة، كما تنظم النوادى العديد من بطولات الكرة فى جميع أنواعها فهناك كرة القدم وهى اكثرها شعبية وهناك كرة السلة والكرة الطائرة.

3**-تكرار كلمة سيارة:**

لمح شرطى المرور سيارة مسرعة تتجاوز سيارته فأشار الى سائقها أن يتوقف لكنه رفض. زاد شرطى المرور من سرعة سيارته حتى أجبر السيارة المسرعة على التوقف وقام بالقبض عليه ثم تبين له أن هذه السيارة مسروقة.

4**-تكرار كلمة عادل:**

عادل تلميذ محبوب يحب أصدقاءه ويتعاون معهم فى نظافة حيهم. رأى رجل تصرف عادل فناداه وسأله ما اسمك؟ فرد عادل فى أدب: اسمى عادل. فقال الرجل: بارك الله فيك يا عادل فأنت مثال للطفل المهذب النشيط.

5**-تكرار كلمة القرود:**

القرود تعيش فى الغابة فى جماعات. تفضل القرود الأشجار العالية. القرود تقفز فوق الأشجار من فرع الى فرع وتأكل من الثمار. هناك أنواع كثيرة من القرود منها الأليف ومنها المفترس.كما أن القرود تؤدى بعض الأعمال المفيدة للانسان مثل احضار ثمار جوز الهند من فوق أشجارها العالية.

**6-تكرار كلمة النحل:**

النحل حشرات مفيدة متعاونة. فى خلية النحل الكل يعمل. ملكة النحل تضع البيض،والشغالات تربى النحل الصغيروتصنع الشمع والعسل أما باقى النحل فيحرس الخلية.

**7-تكرار كلمة فلاح:**

الفلاح نشيط، يصحو مبكرا ويعمل بجد طوال النهار. الفلاح يزرع ما يأكله الناس فهو عضو مهم فى المجتمع. اهتمت الدولة بأحوال الفلاح وأعطتهم الأراضى وساعدتهم فى الزراعة كما اهتمت بصحة الفلاح وتحسين أحواله، لأن الفلاح وجوده مهم فى حياتنا.

**8-تكرار كلمة تلفزيون:**

كل الأطفال يحبون مشاهدة التليفزيون فالعديد من برامج التلفزيون يحبها الأطفال. جميع الأباء والأمهات يوصون بعدم النظر قريبا من التلفزيون وذلك لأن النظر مباشرة للتلفزيون يضعف النظر،وهذا يعد من مساوئ التلفزيون.

**9-تكرار كلمة عنب:**

سأل المعلم أحمد عن أحب الفواكه اليه؟ فقال أحمد أحب العنب، فهو يمد الجسم بالطاقة والفيتامينات. قال المعلم: هل تعلم كيف يزرع العنب يا أحمد؟ فقال أحمد: العنب يزرع فوق عروش خشبية ويخرج محصوله فى الصيف، وهناك أنواع كثيرة من العنب وكلها مفيدة، وأنا أحب العنب بكل أنواعه.

**10-تكرار كلمة شجرة:**

قالت شجرة الموز لشجرة التين: أنا أكثر منك جمالا،فقالت لها شجرة التين: ان المغرور عمره قصيروانك شجرة مغرورة وأنت أقصر الأشجار عمرا.

Stage II:

**اذكر ما له علاقة بالأتى:**

**1-الملابس:**

ليلى عندها دولاب جميل به مكان لملابسها الجميلة. عندما يأتى العيد تحضر لها والدتها فستانا جديدا. ليلى طفلة منظمة وملابسها نظيفة، وتحب الملابس المزركشة.

**2-الطيور:**

كل الطيور لها أجنحة كما أن لها ريش. فى مصر مائة نوع من الطيور تعيش فى المدن والقرى. بعض الطيور تساعد الفلاح وتلتقط الحشرات الضارة.

**3-الكتابة:**

سمير لديه قلم جميل أحضره والده له لتفوقه، وفى حصة الاملاء يخرجه سمير ليكتب به فيصبح خطه جميلا. سمير يحافظ على هذا القلم ويعتز به كثيرا.

**4-الحيوانات:**

ارتدى على معطفه الثقيل المصنوع من الفراء فالجو شديد البرودة. وضع على بعض اللبن لقطته ثم نزل الى مدرسته، وفى الطريق نظر الى حقل من البرسيم الأخضر وقال: سبحان الله، منظر جميل وغذاء للحيوان.

**5-الكرة:**

المدرسة بها فناء كبير به ملعب للعب الكرة،فى حصة الرياضة يقسم المدرس فصلنا الى فرق ويمرنا على قواعد اللعبة.

**6-الفاكهة:**

ذهبت والدة سمير به الى الطبيب وقالت له: ان سمير لا يأكل العديد من الفواكه، فقال له الطبيب: يا سمير ان الفواكه بها مواد تفيد الجسم وتقيه من الأمراض، فالجزر يقوى النظر والبرتقال يقى من نزلات البرد. يا سمير لا تمنع نفسك من الطعام المفيد ولا تحرم نفسك من أكل الفواكه الجميلة.

**7-الخشب:**

جلس سمير على مكتبه لينتهى من واجبه، ثم سمع جرس الباب. ذهب سمير وفتح الباب فوجد جارهم النجار.قال له: يا سمير عندما يأتى والدك أخبره أننى انتهيت من عمل السرير.

**8-المدرسة:**

اذهب فى الصباح الى مدرستى وعندما يدق الجرس نقف صفوفا منتظمة،وبعد تحية العلم ندخل الفصول. وانا أحافظ على مدرستى كما أحافظ على بيتى.

**9-المستشفى:**

المستشفى دار العلاج، يذهب اليه المرضى فيكشف عليهم الأطباء، ويكتبون لهم الدواء، ويستبقون من هو فى حاجة للعلاج ليكون تحت رعايتهم حتى يخرج منها سليما صحيحا.

**10-عيد الميلاد:**

دعانى أحد أصدقائى الى عيد ميلاده فأجبت دعوته واشتريت له هدية جميلة وفى الموعد ذهبت الى منزله فرحب بى وأعطيته هديته وكان مسرورا بها.بعد ذلك وفد الأصدقاء لتهنئة صديقهم. جلسنا قليلا ثم دعانا صديقنا فأطفأنا الشموع ومرحنا وغنينا ثم أكلنا من التورتة وانصرفنا مسرورين.

Stage III:

**1-ما أوله حرف (م):**

مترو الأنفاق معجزة جديدة تنجزها مصر وهو يجرى تحت الأرض ومصر فخورة بأنها أول دولة أفريقية تنجز مشروع عملاق كهذا.

**2-ما أوله حرف (ج):**

جمع الشيخ محمود جيرانه الثلاثة حمدان وسمعان وجميل. بعد العصر جلس الجميع بجوار الساقية تحت الشجرة ثم قال لهم الشيخ: أحب أن يكون جيرانى متحابين.

**3-ما أوله حرف (ف):**

خرج الفلاحون فى الصباح الباكر مسرورين، لأن هذا موسم جنى القطن بدأوا عملهم فى نشاط وسرور وجلس بعضهم مع الريس فهمى لتعبئة القطن فى الأجولة ثم عادوا الى منازلهم مساءا فرحين بعد انتهاء العمل.

**4-ما أوله حرف (د):**

ذهب عادل و داليا الى حديقة الحيوانات. قالت داليا لأخاها:انظر الى هذا الدب الأبيض. فقال لها: انه دب الثلج له فراء كثيف تحته دهون كثيرة لتجعل جسمه دافئا حتى يتحمل الصقيع.

**5-ما أوله حرف (م):**

مصر بلد الأهرام وبلد الأزهر الشريف. يأتى السياح من جميع بلاد العالم لزيارتها ومشاهدة اثارها. مصر تتميز بجوها وموقعها المهم فى العالم.

**6-ما أوله حرف (ن):**

نيلنا يجرى من أسوان الى دمياط ورشيد ونشق منه الترع، النيل حياتنا، نشرب ماءه ونسقى الحيوان والزرع ونصطاد منه السمك.

**7-ما أوله حرف (م):**

القاهرة عاصمة مصر، وهى أكبر مدنها، شوارعها واسعة ومتاجرها مليئة بالبضائع ومظاهر الحضارة القديمة والحديثة فيها واضحة.

**8-ما أوله حرف (ك):**

فى الأسبوع الماضى نال فصلنا كأس النظافة. الان مدرستنا أجمل وأنظف. كلنا نفخر بمدرستنا ونحافظ على كل ما فيها. كمال وهناء أهدوا كأس النظافة الى رائدة الفصل وقالوا لها: سوف نستمر فى نشاطنا ونعممه على مجتمعنا.

9**-ما أوله حرف (ن):**

نهر النيل عظيم. يجرى من وسط افريقيا الى حدود مصر فى الشمال. نظر محمود الى أخيه الأصغر وقال له: واجبنا أن نحافظ على نهر النيل جميلا ونظيفا.

**10-ما أوله حرف (م):**

محمود تلميذ نشيط يعطف على اخوته. محمود ولد أمين فقد وجد مبلغا من المال فى المدرسة. سلم محمود المال الى المدرس ليبحث عن صاحبه.
